# Supplementary material
Source: publisher site journal article supplement (https://www.dovepress.com/article/367588)
Supplement: Supplementary file 1 [file get_supplementary_file.php]

**Table S1 Univariate analysis of risk factors associated with 28-day mortality death in KP, CRKP and CSKP BSI**

| **Characteristic** | **CRKP+CSKP cohort** | | | **CRKP cohort** | | | **CSKP cohort** | | |
| --- | --- | --- | --- | --- | --- | --- | --- | --- | --- |
| **Survivor (n=74)** | **Non-survivor (n=29)** | ***P*-value** | **Survivor (n=36)** | **Non-survivor (n=20)** | ***P*-value** | **Survivor (n=38)** | **Non-survivor (n=9)** | ***P*-value** |
| Age | 9.5 (0-56.75) | 47 (0-66) | 0.255 | 4 (0-55) | 49 (0-66.75) | 0.263 | 10 (0-60.25) | 43 (0-72.5) | 0.337 |
| Sex |  |  | 0.79 |  |  | 0.573 |  |  | 0.52 |
| Female | 53 (71.6%) | 20 (69.0%) |  | 10 (27.8%) | 7 (35.0%) |  | 11 (28.9%) | 2 (22.2%) |  |
| Male | 21 (28.4%) | 9 (31.0%) |  | 26 (72.2%) | 13 (65.0%) |  | 27 (71.1%) | 7 (77.8%) |  |
| **Underlying disease /Comorbid conditions** | | | | | | | | | |
| Hypertensive | 2 (2.7%) | 1 (3.4%) | 1 | 2 (5.6%) | 1 (5.0%) | 1 | 1 (2.6%) | 0 | 0.623 |
| Diabetes diseases | 10 (13.5%) | 4 (13.8%) | 1 | 4 (11.1~~)~~ | 2 (10.0%) | 1 | 6 (15.8%) | 2 (22.2%) | 0.644 |
| Coronary heart disease | 4 (5.4%) | 1 (3.4%) | 1 | 4 (11.1%) | 0 | 0.285 | 0 | 1 (11.1%) | **0.038** |
| Congestive heart failure | 5 (6.8%) | 3 (10.3%) | 0.684 | 2 (5.6%) | 1 (5.0%) | 1 | 3 (7.89%) | 2 (22.2%) | 0.21 |
| Connective tissue disease | 0 | 2 (6.9%) | 0.077 | 0 | 2 (10.0%) | 0.123 | 0 | 0 | / |
| Chronic pulmonary disease | 2 (2.7%) | 2 (6.9%) | 0.315 | 0 | 1 (5.0%) | 0.375 | 2 (5.26%) | 1 (11.1%) | 0.519 |
| Chronic kidney failure | 4 (5.4%) | 2 (6.9%) | 1 | 3 (8.3%) | 2 (10.0%) | 1 | 1 (2.6%) | 0 | 0.623 |
| End-stage liver disease | 1 (1.4%) | 0 | 1 | 0 | 0 |  | 1 (2.6%) | 0 | 0.623 |
| Cancer | 8 (10.8%) | 3 (10.3%) | 1 | 3 (8.3%) | 2 (10.0%) | 1 | 5 (13.2%) | 1 (11.1%) | 0.869 |
| Hematogenous tumor | 7 (9.5%) | 1 (3.4%) | 0.436 | 1 (2.8%) | 1 (5.0%) | 1 | 6 (15.8%) | 0 | 0.202 |
| Charlson comorbidity index>2 | 12 (16.2%) | 4 (15.5%) | 1 | 6 (16.7%) | 2 (10.0%) | 0.697 | 6(15.8%) | 2(22.2%) | 0.644 |
| Location before admission | / | / | 0.38 | / | / | 0.9 | 10(26.3%) | 3 (33.3%) | 0.377 |
| Home | 37 (50.0%) | 14 (48.3%) | 0.875 | 16 (44.4%) | 8 (40.0%) | 0.747 | 21 (55.3%) | 6 (66.7%) | 0.534 |
| Transfer from other hospital | 28 (37.8%) | 14 (33.3%) | 0.332 | 18 (50.0%) | 11 (55.0%) | 0.72 | 10 (26.3%) | 3 (33.3%) | 0.672 |
| Born this episode | 9 (12.2%) | 1 (3.4%) | 0.275 | 2 (5.6%) | 1 (5.0%) | 1 | 7 (18.4%) | 0 | 0.163 |
| **Health-care exposures before BSI onset** | | | | | | | | | |
| Antibiotic exposure (within 30 days) | 61 (82.4%) | 24 (82.8 %) | 0.969 | 31 (86.1%) | 19 (95.0%) | 0.405 | 30 (78.9%) | 5 (55.5%) | 0.148 |
| ICU admission (within 30 days) | 20 (27.0%) | 15 (51.7%) | **0.017** | 12 (33.3%) | 11 (55.0%) | 0.114 | 8 (21.1%) | 4 (44.4%) | 0.148 |
| Surgery (within 30 days) | 27 (36.5 %) | 7 (24.1%) | 0.231 | 15 (41.7%) | 5 (25.0%) | 0.212 | 12 (31.6%) | 2 (22.2%) | 0.581 |
| Corticosteroid therapy (within 30 days) | 7 (9.5%) | 6 (20.7%) | 0.184 | 2 (5.6%) | 5 (250%) | 0.084 | 5 (13.2%) | 1 (11.1%) | 0.869 |
| Radiation therapy or chemotherapy | 7 (9.5%) | 1 (3.4%) | 0.436 | 1 (2.8%) | 1 (5.0%) | 1 | 6 (15.8%) | 0 | 0.202 |
| Immunosuppressive therapy (within 3 months) | 13 (17.6%) | 7 (24.1%) | 0.448 | 5 (13.9%) | 6 (30.0%) | 0.174 | 8 (21.1%) | 1 (11.1%) | 0.496 |
| Tracheal cannula or tracheotomy (within 30 days) | 25 (33.8%) | 24 (82.8%) | **<0.01** | 16 (44.4%） | 18 (90.0%) | **0.001** | 9 (23.7%) | 6 (66.7%) | **0.013** |
| Central venous catheterization (within 30 days) | 42 (56.8%) | 25 (86.2%) | **0.005** | 21 (58.3%) | 19 (95.0%) | **0.004** | 21 (55.3%) | 6 (66.7%) | 0.534 |
| Previous hospitalization (within 12 months) | 67 (90.5%) | 26 (89.7%) | 1 | 33 (91.7%) | 18 (90.0%) | 1 | 34 (89.5%) | 8 (88.9%) | 0.959 |
| ICU at time of BSI onset | 17 (23.0%) | 16 (55.2%) | **0.002** | 9 (25.0%) | 11 (55.0%) | **0.025** | 8 (21.1%) | 5 (55.5%) | **0.037** |
| **Epidemiological classification** |  |  | 0.184 |  |  | 0.236 |  |  | 0.926 |
| Community acquired | 16 (21.6%) | 3 (10.3%) |  | 7 (19.4%) | 1 (5.0%) |  | 9 (23.7%) | 2 (22.2%) |  |
| Hospital acquired | 58 (78.4%) | 26 (89.7%) |  | 29 (80.6%) | 19 (95.0%) |  | 29 (76.3%) | 7 (77.8%) |  |
| **Source** | | | | | | | | | |
| Primary | 22 (29.7%) | 2 (6.9%) | **0.014** | 10 (27.8%) | 2 (10.0%) | 0.178 | 12 (31.6%) | 0 | 0.051 |
| Central-line associated | 6 (8.1%) | 3 (10.3%) | 0.709 | 4 (11.1%) | 2 (10.0%) | 1 | 2 (5.26%) | 1 (11.1%) | 0.519 |
| Cardiovascular system infection | 1 (1.4%) | 0 | 1 | / | / | / | 1 (2.6%) | 0 | 0.623 |
| Gastrointestinal system infection | 17 (23.0%) | 7 (24.1%) | 0.9 | 8 (22.2%) | 5 (25.0%) | 1 | 9 (23.7%) | 2 (22.2%) | 0.926 |
| Pneumonia or ventilator-associated event | 17 (23.0%) | 13 (44.8%) | **0.028** | 7 (19.4%) | 9 (45.0%) | **0.043** | 10(26.3%) | 4 (44.4%) | 0.285 |
| Surgical site infection | 1 (1.4%) | 1 (3.4%) | 0.486 | 1 (2.8%) | 0 | 1 | 0 | 1 (11.1%) | **0.038** |
| Skin and soft tissue infection | 3 (4.1%) | 1 (3.4%) | 1 | 2 (5.6%) | 1 (5.0%) | 1 | 1 (2.6%) | 0 | 0.623 |
| Urinary tract infection | 7 (9.5%) | 2 (6.9%) | 1 | 4 (11.1%) | 1 (5.0%) | 0.645 | 3 (7.89%) | 1 (11.1%) | 0.756 |
| Mechanical ventilation after BSI onset | 20 (27.0%) | 27 (93.1%) | **<0.01** | 12 (33.3%) | 19 (95.0%) | **<0.01** | 8 (21.1%) | 8 (88.9%) | **<0.01** |
| Hemodialysis treatment | 6 (8.1%) | 9 (31.0%) | **0.01** | 3 (8.3%) | 7 (35.0%) | **0.025** | 3 (7.89%) | 2 (22.2%) | 0.21 |
| Temperature ≥39℃ or <36℃ after BSI onset | 35 (47.3%) | 13 (44.8%) | 0.821 | 18 (50.0%) | 9 (45.0%) | 0.72 | 17 (44.7%) | 4 (44.4%) | 0.987 |
| Severe sepsis | 19 (25.7%) | 27 (93.1%) | **<0.01** | 8 (22.2%) | 18 (90.0%) | **<0.01** | 11 (28.9%) | 9 (100%) | **<0.01** |
| Septic shock | 7 (9.5%) | 24 (82.8%) | **<0.01** | 2 (5.6%) | 15 (75.0%) | **<0.01** | 5 (13.2%) | 9 (100%) | **<0.01** |
| Active empiric antibiotic therapy | 52 (70.3%) | 17 (58.6%) | 0.258 | 16 (44.4%) | 9 (45.0%) | 0.968 | 36 (94.7%) | 8 (88.9%) | 0.519 |
| Active directed antibiotic therapy | 62 (83.8%) | 18 (62.1%) | **0.017** | 26 (72.2%) | 13 (65.0%) | 0.573 | 36 (94.7%) | 5 (55.5%) | **0.002** |
| Combination therapy | 4 (5.4%) | 2 (6.9%) | 1 | 1 (2.8%) | 2 (10.0%) | 0.288 | 3 (7.89%) | 0 | 0.384 |
| Carbapenem-including treatment | 50 (67.6%) | 21 (72.4%) | 0.633 | 25 (69.4%) | 15 (75.0%) | 0.659 | 25 (65.8%) | 6 (66.7%) | 0.96 |
| Polymyxin-including treatment | 1 (1.4%) | 4 (13.8%) | **0.008** | 1 (2.8%) | 4 (20.0%) | 0.05 | 0 | 0 | / |
| Tigecycline-including treatment | 8 (10.8%) | 5 (17.2%) | 0.51 | 7 (19.4%) | 5 (25.0%) | 0.737 | 1 (2.6%) | 0 | 0.623 |
| Length of hospitalization before the onset of BSI | 11 (2.75-19.50) | 12 (4.00-36.00) | 0.146 | 10.00 (3.00-18.25) | 23.00 (7.75-44.25) | 0.392 | 11.5 (1-21.75) | 7 (1-11) | 0.284 |
| Length of hospitalization after the onset of BSI | 18.5 (11.00-30.00) | 5 (1.00-13.00) | **0.027** | 20.70 (12.00-28.25) | 6.50 (3.25-13.50) | 0.116 | 18.5 (11-30.5) | 4 (0-12) | 0.15 |
| Total length of stay (days) | 28 (17.75-51.5) | 29 (9.5-43.5) | 0.103 | 28.00 (16.00-50.75) | 30.00 (16.25-50.50) | 0.881 | 32.5 (20-57.75) | 7 (2-33) | 0.385 |

**Notes:** *P* values less than 0.05 are bolded; KP *Klebsiella pneumoniae*, CRKP carbapenem-resistant KP; CSKP carbapenem susceptible KP, BSI bloodstream infection.

**Table S2 Univariate analysis of risk factors associated with In-hospital mortality death in KP, CRKP and CSKP BSI**

| **Characteristic** | **CRKP+CSKP** | | | **CRKP cohort** | | | **CSKP cohort** | | |
| --- | --- | --- | --- | --- | --- | --- | --- | --- | --- |
| **Survivor (n=72)** | **Non-survivor (n=31)** | ***P*-value** | **Survivor (n=34)** | **Non-survivor (n=22)** | ***P*-value** | **Survivor (n=38)** | **Non-survivor (n=9)** | ***P*-value** |
| Age | 8.00 (0-55.75) | 51 (0-68.00) | 0.105 | 1 (0-54.25) | 56 (53-72) | 0.081 | 10 (0-60.25) | 43 (0-72.5) | 0.4 |
| Sex |  |  | 0.989 |  |  | 0.848 |  |  | 0.7 |
| Female | 21 (29.2%) | 9 (29.0%) |  | 10 (29.4%) | 7 (31.8%) |  | 11 (28.9%) | 2 (22.2%) |  |
| Male | 51 (70.8%) | 22 (71.0%) |  | 24 (70.6%) | 15 (68.2%) |  | 27 (71.1%) | 7 (77.8%) |  |
| **Underlying disease /Comorbid conditions** | | | | | | | | | |
| Hypertensive | 2 (2.8%) | 1 (3.2%) | 1 | 2 (5.9%~~)~~ | 1 (4.5%~~)~~ | 1 | 0 | 0 | / |
| Diabetes diseases | 10 (13.9%) | 4 (12.9%) | 1 | 4 (11.8%) | 2 (9.1%) | 1 | 6 (15.8%) | 2 (22.2%) | 0.6 |
| Coronary heart disease | 4 (5.6%) | 1 (3.2%) | 1 | 4 (11.8%) | 0 | 0.146 | 0 | 1 (11.1%) | 0.2 |
| Congestive heart failure | 5 (6.9%) | 3 (9.7%) | 0.694 | 2 (5.9%) | 1 (4.5%) | 1 | 3 (7.89%) | 2 (22.2%) | 0.2 |
| Connective tissue disease | 0 | 2 (6.5%) | 0.089 | 0 | 2 (9.1%) | 0.15 | 0 | 0 | / |
| Chronic pulmonary disease | 2 (2.8%) | 2 (6.5%) | 0.582 | 0 | 1 (4.5%) | 0.393 | 2 | 1 (11.1%) | 0.5 |
| Chronic kidney failure | 4 (5.6%) | 2 (6.5%) | 1 | 3 (8.8%) | 2 (9.1%) | 1 | 1 (2.6%) | 0 | 0.6 |
| End-stage liver disease | 1 (1.4%) | 0 | 1 | 0 | 0 | / | 1 (2.6%) | 0 | 0.6 |
| Cancer | 8 (11.1%) | 3 (9.7%) | 1 | 3 (8.8%) | 2 (9.1%) | 1.000 | 5 (13.2%) | 1 (11.1%) | 0.9 |
| Hematogenous tumor | 7 (9.7%) | 1 (3.2%) | 0.43 | 1 (2.9%) | 1 (4.5%) | 1.000 | 6 (15.8%) | 0 | 0.2 |
| Charlson comorbidity index>2 | 12 (16.7%) | 4 (12.9%) | 0.771 | 6 (17.6%) | 2 (9.1%) | 0.46 | 6 (15.8%) | 2 (22.2%) | 0.6 |
| Location before admission | / | / | 0.296 | / | / | 0.545 | 0 | 3 (33.3%) | 0.4 |
| Home | 36 (50.0%) | 15 (48.4%) | 0.881 | 15 (44.1%) | 9 (40.9%) | 0.813 | 21 (55.3%) | 6 (66.7%) | 0.5 |
| Transfer from other hospital | 27 (37.5%) | 15 (48.4%) | 0.302 | 17 (50.0%) | 12 (54.5%) | 0.74 | 10 (26.3%) | 3 (33.3%) | 0.7 |
| Born this episode | 9 (12.5%) | 1 (3.2%) | 0.275 | 2 (5.9%) | 1 (4.5%) | 1 | 7 (18.4%) | 0 | 0.2 |
| **Health-care exposures before BSI onset** | | | | | | | | | |
| Antibiotic exposure (within 30 days) | 59 (81.9%) | 26 (83.9%) | 0.813 | 29 (85.3%) | 21 (95.5%) | 0.386 | 30 (78.9%) | 5 (55.5%) | 0.1 |
| ICU admission (within 30 days) | 18 (25.0%) | 17 (54.8%) | **0.003** | 10 (29.4%) | 13 (59.1%) | **0.027** | 8 (21.1%) | 4 (44.4%) | 0.1 |
| Surgery (within 30 days) | 26 (36.1%) | 8 (25.8%) | 0.308 | 14 (41.2%) | 6 (27.3%) | 0.289 | 12 (31.6%) | 2 (22.2%) | 0.6 |
| Corticosteroid therapy (within 30 days) | 7 (9.7%) | 6 (19.4%) | 0.203 | 2 (5.9%) | 5 (22.7%) | 0.099 | 5 (13.2%) | 1 (11.1%) | 0.9 |
| Radiation therapy or chemotherapy | 7 (9.7%) | 1 (3.2%) | 0.43 | 1 (2.9%) | 1 (4.5%) | 1 | 6 (15.8%) | 0 | 0.2 |
| Immunosuppressive therapy (within 3 months) | 13 (18.1%) | 7 (22.6%) | 0.594 | 5 (14.7%) | 6 (27.3%) | 0.31 | 8 (21.1%) | 1(11.1%) | 0.5 |
| Tracheal cannula or tracheotomy (within 30 days) | 23 (31.9%) | 26 (83.9%) | **<0.01** | 14 (41.2%) | 20 (90.9%) | **<0.001** | 9 (23.7%) | 6 (66.7%) | **0** |
| Central venous catheterization (within 30 days) | 40 (55.6%) | 27 (87.1%) | **0.002** | 19 (55.9%) | 21 (95.5%) | **0.001** | 21 (55.3%) | 6 (66.7%) | 0.5 |
| Previous hospitalization (within 12 months) | 65 (90.3%) | 28 (90.3%) | 1 | 31 (91.2%) | 20 (90.9%) | 1 | 34 (89.5%) | 8 (88.9%) | 1 |
| ICU at time of BSI onset | 15 (20.8%) | 18 (58.1%) | **<0.01** | 7 (20.6%) | 13 (59.1%) | **0.003** | 8 (21.1%) | 5 (55.5%) | **0** |
| **Epidemiological classification** |  |  | 0.132 |  |  | 0.13 |  |  | 0.9 |
| Community acquired | 16 (22.2%) | 3 (9.7%) |  | 7 (20.6%) | 1 (4.5%) |  | 9 (23.7%) | 2 (22.2%) |  |
| Hospital acquired | 56 (77.8%) | 28 (90.3%) |  | 27 (79.4%) | 21 (95.5%) |  | 29 (76.3%) | 7 (77.8%) |  |
| **Source** | | | | | | | | | |
| Primary | 22 (30.6%) | 2 (6.5%) | **0.008** | 10 (29.4%) | 2 (9.1%) | 0.099 | 12 (31.6%) | 0 | 0.1 |
| Central-line associated | 5 (6.9%) | 4 (12.9%） | 0.447 | 3 (8.8%) | 3 (13.6%） | 0.67 | 2 (5.26%) | 1 (11.1%) | 0.5 |
| Cardiovascular system infection | 1 (1.4%) | 0 | 1 | 0 | 0 | / | 1 (2.6%) | 0 | 0.6 |
| Gastrointestinal system infection | 17 (23.6%) | 7 (22.6%) | 0.91 | 8 (23.5%) | 5 (22.7%) | 0.945 | 9 (23.7%) | 2 (22.2%) | 0.9 |
| Pneumonia or ventilator-associated event | 17 (23.6%) | 13 (41.9%) | 0.06 | 7 (20.6%) | 9 (40.9%) | 0.1 | 10 (26.3%) | 4 (44.4%) | 0.3 |
| Surgical site infection | 1 (1.4%) | 1 (3.2%) | 0.513 | 1 (2.9%) | 0 | 1 | 0 | 1 (11.1%) | **0** |
| Skin and soft tissue infection | 2 (2.8%) | 2 (6.5%) | 0.582 | 1 (2.9%) | 2 (9.1%) | 0.555 | 1 (2.6%) | 0 | 0.6 |
| Urinary tract infection | 7 (9.7%) | 2 (6.5%) | 0.72 | 4 (11.8%) | 1 (4.5%) | 0.638 | 3 (7.89%) | 1 (11.1%) | 0.8 |
| Mechanical ventilation after BSI onset | 18 (25.0%) | 29 (93.5%) | **<0.01** | 10 (29.4%) | 21 (95.5%) | **<0.001** | 8 (21.1%) | 8 (88.9%) | **<0.01** |
| Hemodialysis treatment | 5 (6.9%) | 10 (32.3%) | **0.002** | 2 (5.9%) | 8 (36.4%) | **0.009** | 3 (7.89%) | 2 (22.2%) | 0.2 |
| Temperature ≥39℃ or <36℃ after BSI onset | 34 (47.2%) | 14 (45.2%) | 0.847 | 17 (50%) | 10(45.5%) | 0.74 | 17 (44.7%) | 4 (44.4%) | 1 |
| Severe sepsis | 18 (25.0%) | 28 (90.3%) | **<0.01** | 7 (20.6%) | 19 (86.4%) | **<0.001** | 11 (28.9%) | 9 (100%) | **<0.01** |
| Septic shock | 7 (9.7%) | 24 (77.4%) | **<0.01** | 2 (5.9%) | 15 (68.2%) | **<0.001** | 5 (13.2%) | 9 (100%) | **<0.01** |
| Active empiric antibiotic therapy | 51 (70.8%) | 18 (58.1%) | 0.206 | 15 (44.1%) | 10 (45.5%) | 0.922 | 36 (94.7%) | 8 (88.9%) | 0.5 |
| Active directed antibiotic therapy | 60 (83.3%) | 20 (64.5%) | **0.035** | 24 (70.6%) | 15 (68.2%) | 0.848 | 36 (94.7%) | 5 (55.5%) | **0** |
| Combination therapy | 4 (5.6%) | 2 (6.5%) | 1 | 1 (2.9%) | 2 (9.1%) | 0.555 | 3 (7.89%) | 0 | 0.4 |
| Carbapenem-including treatment | 48 (66.7%) | 23 (74.2%) | 0.449 | 23 (67.6%） | 17 (77.3%) | 0.436 | 25 (65.8%) | 6 (66.7%) | 1 |
| Polymyxin-including treatment | 0 | 5 (16.1%) | **0.002** | 0 | 5 (22.7%) | **0.007** | 0 | 0 | / |
| Tigecycline-including treatment | 7 (9.7%) | 6 (19.4%) | 0.203 | 6 (17.6%) | 6 (27.3%) | 0.391 | 1 (2.6%) | 0 | 0.6 |
| Length of hospitalization before the onset of BSI | 11 (2.25-19) | 12 (4-36) | 0.18 | 8.5 (2.75-16.75) | 23 (9.25-47) | 0.758 | 11.5 (1-21.75) | 7 (1-11) | 0.2 |
| Length of hospitalization after the onset of BSI | 18.5 (11.25-29.75) | 5 (1-14) | **0.039** | 18 (12-26.75) | 7.5 (3.75-14.25) | **0.008** | 18.5 (11-30.50) | 4 (0-12) | 0.3 |
| Total length of stay (days) | 28 (17.25-51) | 30 (10-49) | 0.281 | 27 (15.75-47) | 31 (16.75-53.75) | 0.553 | 32.5 (20-57.75) | 7 (2-33) | 0.4 |

**Notes:** *P* values less than 0.05 are bolded; KP *Klebsiella pneumoniae*, CRKP carbapenem-resistant KP; CSKP carbapenem susceptible KP, BSI bloodstream infection.
